# Supplementary material for: Charge carrier transport in perylene-based and pyrene-based columnar liquid crystals
Source: publisher site journal article supplement (doi:10.3762/bjoc.19.128), 2023-11-16
Supplement: Additional file 1 [file 1860-5397-19-128-S1.pdf]

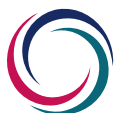

## Supporting Information

for

### Charge carrier transport in perylene-based and pyrene-based columnar liquid crystals

Alessandro L. Alves, Simone V. Bernardino, Carlos H. Stadlober, Edivandro Giroto, Giliandro Farias, Rodney M. do Nascimento, Sergio F. Curcio, Thiago Cazati, Marta E. R. Dotto, Juliana Eccher, Leonardo N. Furini, Hugo Gallardo, Harald Bock and Ivan H. Bechtold

*Beilstein J. Org. Chem.* **2023**, *19*, 1755–1765. [doi:10.3762/bjoc.19.128](https://doi.org/10.3762/bjoc.19.128)

## Additional data and information

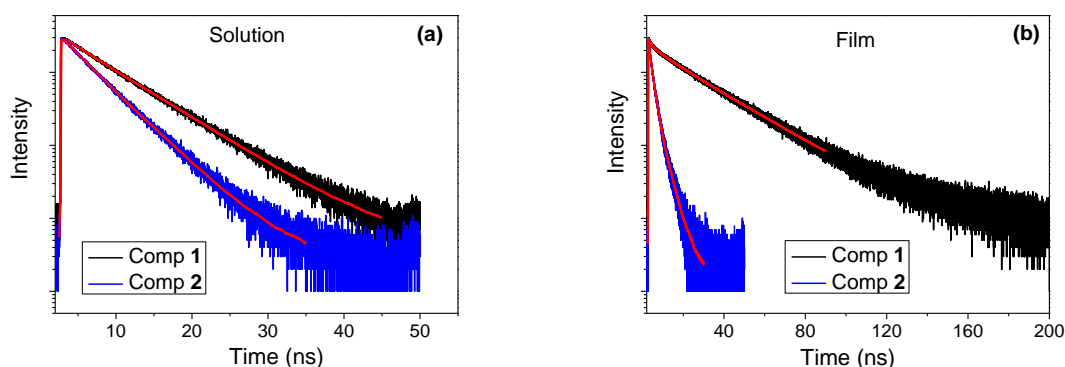

**Figure S1:** Fluorescence decay curves of compounds **1** and **2** in solution (a) and film (b). The red lines indicate the exponential fittings.

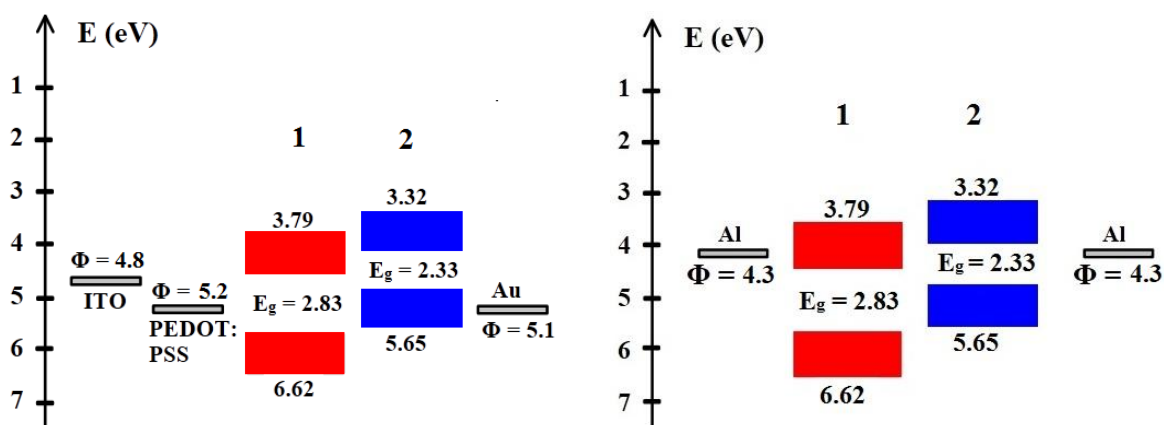

**Scheme S1:** Hole-only (left) and electron-only (right) device structures for compounds **1** and **2**.

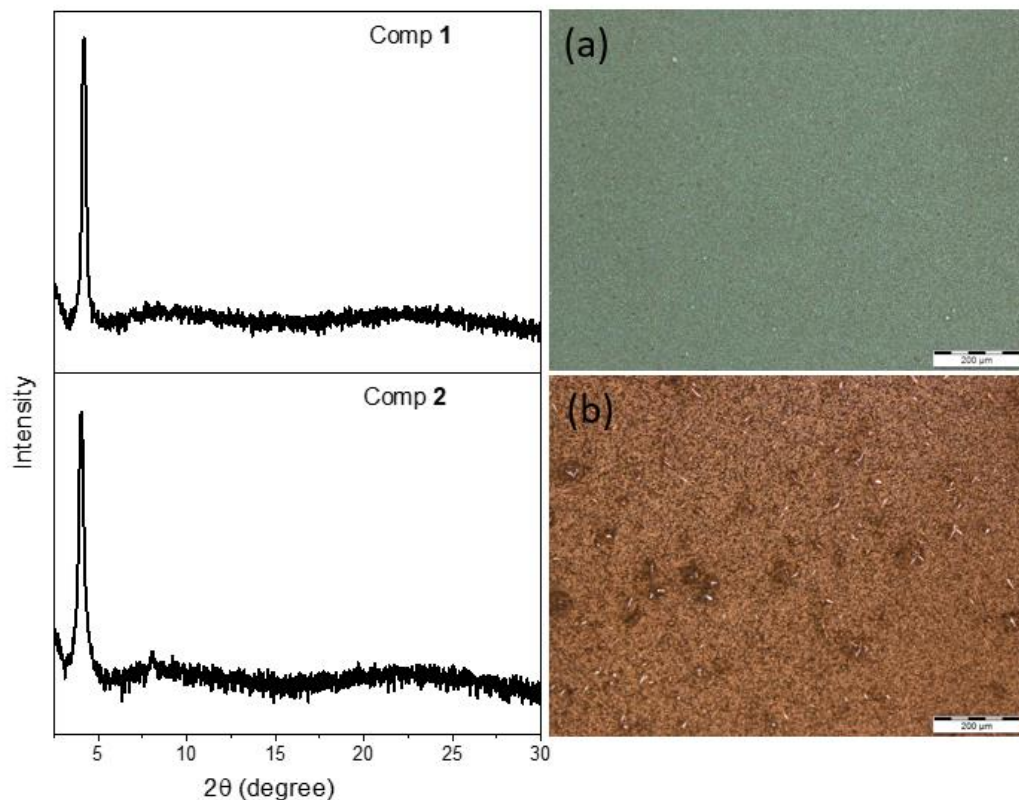

**Figure S2:** XRD and polarized optical microscopy of spin-coated films of **1** (a) and **2** (b).

**Table S1.** Calculated Cartesian coordinates for **1-iso**.

|   |                   |                   |                   |
|---|-------------------|-------------------|-------------------|
| C | -3.58315748550623 | 0.96426507758844  | -0.01127730929482 |
| C | -4.60543668588654 | -0.07658921177600 | 0.10459544787442  |
| C | -4.19520735762568 | -1.43090073279635 | 0.29648552614612  |
| C | -2.20622002019265 | 0.59407939581935  | 0.06891553657631  |
| C | -1.81154517881474 | -0.76771798322179 | 0.26363446275810  |
| C | -2.81105788254334 | -1.78485469371254 | 0.37823174622915  |
| C | -3.89851548441123 | 2.32172277510463  | -0.20001822789941 |
| C | -1.19792538007709 | 1.59549675205106  | -0.04638374144486 |
| C | -5.17830359135413 | -2.45727024003410 | 0.40993481159026  |
| C | -0.42183343985661 | -1.09477437856802 | 0.34076289541672  |
| C | -2.44404144030265 | -3.15265308827426 | 0.57291441270607  |
| C | 0.56296799758017  | -0.06778456843243 | 0.22063311672111  |

|   |                   |                   |                   |
|---|-------------------|-------------------|-------------------|
| C | 0.18488919038681  | 1.23800598750285  | 0.03158679647061  |
| C | -1.55717584952266 | 2.94026590352043  | -0.23782254310882 |
| C | -0.09538818837993 | -2.45720142839151 | 0.53594109644832  |
| C | -1.06108553332103 | -3.43901383909737 | 0.64661850015716  |
| C | 1.25247090112685  | -3.10756495937041 | 0.65932592346298  |
| C | -0.36999711844236 | -4.75457723777505 | 0.84421314186689  |
| C | -4.78064730553173 | -3.81765711472178 | 0.60309979079945  |
| C | -3.45321688754902 | -4.15656105877964 | 0.68284725101825  |
| C | -6.54437928511514 | -2.13822026505233 | 0.33283918210160  |
| C | -6.93582856122438 | -0.81079079249351 | 0.14569708978196  |
| C | -5.98271895920313 | 0.19889033220405  | 0.03414761062729  |
| C | -7.58777492573148 | -3.19160149178036 | 0.44742599950999  |
| H | -8.00261579823737 | -0.58888736953113 | 0.08976716029239  |
| C | -2.90633461500727 | 3.29294745581715  | -0.31162872292088 |
| H | 1.62107479815667  | -0.32399371393412 | 0.27822051024047  |
| C | 1.24396243201482  | 2.28216444441826  | -0.09407282352955 |
| C | -0.52369616444634 | 4.00159948512787  | -0.36616288848461 |
| H | -3.15903939410906 | 4.34407218017607  | -0.45894645000440 |
| H | -4.94000261700419 | 2.63573019253765  | -0.26196334767409 |
| H | -3.16697766534542 | -5.19820490257000 | 0.83039785918289  |
| C | -5.80584734493778 | -4.89573655020675 | 0.72182140342239  |
| H | -6.32710991062499 | 1.22234037434599  | -0.11106941834161 |
| N | 1.00347619883482  | -4.47193750211162 | 0.84174152212309  |
| C | 2.03087304275917  | -5.50957109517197 | 1.00974506114530  |
| C | 2.84524531481172  | -5.26914498106491 | 2.28301551891551  |
| H | 3.42280136268393  | -4.33623454460999 | 2.20901969439484  |
| H | 3.54748817166033  | -6.10236548923569 | 2.44018606820259  |

|   |                   |                   |                   |
|---|-------------------|-------------------|-------------------|
| H | 2.18601850459641  | -5.20732750768344 | 3.16273689386306  |
| C | 2.90043228727542  | -5.62575112988325 | -0.24429265773448 |
| H | 1.44817008820072  | -6.43569049393860 | 1.12743223976622  |
| H | 3.47608627629919  | -4.70318909499789 | -0.40871727635085 |
| H | 2.28022161249437  | -5.81858647147334 | -1.13330032680889 |
| H | 3.60755725763769  | -6.46213105507573 | -0.13284169901740 |
| N | -7.15012047146781 | -4.51480573209163 | 0.63482755285958  |
| C | -8.20448015779352 | -5.56314017497984 | 0.74867303265785  |
| H | -9.13425120951941 | -4.99222251566792 | 0.64805014891430  |
| C | -8.13475385329284 | -6.56242389241093 | -0.40760979218566 |
| C | -8.19964807497523 | -6.22100435248112 | 2.13006302290541  |
| H | -8.25753200781521 | -5.45954584276538 | 2.92369132896984  |
| H | -7.29917039355295 | -6.82943941639514 | 2.28652487157347  |
| H | -9.08355221984742 | -6.87149007888240 | 2.22340156667634  |
| H | -7.23150432265796 | -7.18418875679474 | -0.35311875574253 |
| H | -8.14809478117333 | -6.03772616323928 | -1.37598852085317 |
| H | -9.01693482356829 | -7.22080454771250 | -0.37010359457899 |
| N | 0.82250948039662  | 3.60294602033841  | -0.28995267132722 |
| C | 1.85015723043885  | 4.67397000229804  | -0.43363030624315 |
| H | 1.24793348149778  | 5.57848680988858  | -0.57381630158003 |
| C | 2.70209160105264  | 4.47297506295904  | -1.68836208017801 |
| C | 2.67116836560899  | 4.84592084811549  | 0.84555998571136  |
| H | 2.01092715166563  | 4.99920447501612  | 1.71368859390041  |
| H | 3.30963227133224  | 5.73803253469100  | 0.74735327523244  |
| H | 3.31278287027587  | 3.97553206271376  | 1.03576865087696  |
| H | 2.06287890286710  | 4.36023471666210  | -2.57824495680195 |
| H | 3.34994463357959  | 3.59073994612076  | -1.60236961718896 |

|   |                   |                   |                   |
|---|-------------------|-------------------|-------------------|
| H | 3.33597880777662  | 5.36072320103725  | -1.84052208029770 |
| O | -0.83504073028541 | 5.16716347930077  | -0.53232738800337 |
| O | 2.42486676439837  | 1.99532207729998  | -0.03025808133656 |
| O | -8.77186479271315 | -2.91508387170165 | 0.38108925616614  |
| O | -5.48453698802141 | -6.05785032900515 | 0.88657473467176  |
| O | -0.85649464911119 | -5.85382630489053 | 0.98123685720176  |
| O | 2.34592254868998  | -2.58798462787097 | 0.61498443080284  |

**Table S2.** Calculated Cartesian coordinates for **2-iso**.

|   |                   |                   |                   |
|---|-------------------|-------------------|-------------------|
| C | -3.53755610986468 | 0.78161710826123  | -0.22987129849116 |
| C | -4.43610659850284 | -0.21597944474441 | -0.02579730512958 |
| C | -4.00717818139385 | -1.52721581129557 | 0.39114307623448  |
| C | -2.12643464633481 | 0.55973386883416  | -0.03804945671951 |
| C | -1.65975256157212 | -0.74485913729950 | 0.33593015529642  |
| C | -2.60701663820962 | -1.79566715528641 | 0.55444213536261  |
| H | -3.86827370400224 | 1.77911577520191  | -0.53035102846718 |
| C | -1.21538937572966 | 1.59843431131864  | -0.16217040936663 |
| H | -5.50672661674333 | -0.03975717379631 | -0.15760760313907 |
| C | -4.92871802258459 | -2.52128143719210 | 0.68470074920324  |
| C | -0.26492122755257 | -0.96762027923621 | 0.51640231327260  |
| C | -2.18153485486597 | -3.09224194860562 | 0.96262797947675  |
| C | 0.67813618041310  | 0.09141344516198  | 0.22971246019800  |
| C | 0.17541474747182  | 1.41741792103197  | -0.00991234958593 |
| H | -1.60895877835472 | 2.58522838292626  | -0.40071921898498 |
| C | 1.07426587322810  | 2.56637468657288  | -0.09393472010031 |
| C | 0.10854255263643  | -2.22752079156888 | 1.06747521144613  |

|   |                   |                   |                   |
|---|-------------------|-------------------|-------------------|
| C | 2.10686945886084  | -0.06421198120367 | 0.15792482609846  |
| C | -0.79925372957413 | -3.23300905113284 | 1.28015960257450  |
| H | 1.14063075854388  | -2.40957212836650 | 1.34093436288960  |
| H | -0.43841559470119 | -4.15890386929238 | 1.71037103572853  |
| C | -4.55078285031676 | -3.82251567013223 | 1.07699201261581  |
| C | -3.15186582214567 | -4.15468783078676 | 1.12002852089823  |
| C | -2.84039672935189 | -5.54619443251427 | 1.31859086847151  |
| C | 2.48744201355404  | 2.37177559257334  | -0.02737400169852 |
| C | 2.94705804636865  | 1.02595241429458  | 0.04810476676544  |
| C | 2.98099653064244  | -1.29279816020592 | -0.00965723581952 |
| C | 4.36452918647845  | 0.55507119436425  | -0.05472482259610 |
| H | -5.98413538415273 | -2.27063202606914 | 0.59143544493290  |
| C | -5.57573711971298 | -4.80044190521135 | 1.43479884316460  |
| C | 0.60298387465839  | 3.89717015461274  | -0.21613585238315 |
| C | 3.37079672603488  | 3.48085229317849  | -0.08247130917390 |
| C | -3.82138970039169 | -6.46931563798155 | 1.62325227679480  |
| C | -1.56858280809864 | -6.34094622483605 | 1.08729627716735  |
| C | -5.20208959354512 | -6.14275511524870 | 1.74636869670851  |
| C | -6.18513018288960 | -7.09606703197519 | 2.11835156978682  |
| C | 1.47711835582235  | 4.96931785138501  | -0.26549527762034 |
| C | 2.87015462275428  | 4.76310619182026  | -0.19910952817513 |
| H | 4.44241360695974  | 3.29101267762547  | -0.03523030719223 |
| H | 3.55170159678591  | 5.61613946284626  | -0.23848365516226 |
| H | -0.46645104542204 | 4.09934409829965  | -0.25623953143431 |
| H | 1.08011125797717  | 5.98380229095537  | -0.35175794301875 |
| C | -3.21038125944811 | -7.83240573679842 | 1.72663245319517  |
| C | -7.51591688480428 | -6.73198564608054 | 2.18666811012811  |

|   |                   |                    |                   |
|---|-------------------|--------------------|-------------------|
| C | -7.89811225032999 | -5.40926914965377  | 1.88403547505929  |
| C | -6.95122647759497 | -4.46935947088451  | 1.51551253638222  |
| H | -8.94982279234658 | -5.11865886187452  | 1.94492455748925  |
| H | -7.28491746396164 | -3.45428338387250  | 1.30479597363972  |
| H | -5.86186865352098 | -8.11197509095571  | 2.34191740242758  |
| H | -8.27077971842970 | -7.46668032066388  | 2.47663381487338  |
| N | -1.86856380924950 | -7.67418326326037  | 1.39783219457427  |
| N | 4.30339811330178  | -0.83401056555574  | -0.08211889619849 |
| O | -3.74157971964062 | -8.88419996151351  | 2.02088597525039  |
| O | -0.48689949643230 | -5.98934391751008  | 0.67626882291206  |
| O | 2.68179607680599  | -2.45972777697087  | -0.11619391544979 |
| O | 5.38268676740150  | 1.21424883738726   | -0.11616303844457 |
| C | -0.88088897652539 | -8.75538770291259  | 1.29133852926866  |
| C | 5.44970448977836  | -1.73566466528578  | -0.25086462300420 |
| C | -0.66895250590982 | -9.43641858555401  | 2.64525967553905  |
| H | 0.04425471860745  | -8.23542991212862  | 1.00186422770910  |
| C | -1.26035921052692 | -9.73829848359946  | 0.18119804595801  |
| H | -2.20193131924571 | -10.25494808149109 | 0.41869505678333  |
| H | -0.46863983240914 | -10.49442159861121 | 0.06253831118207  |
| H | -1.37816634662153 | -9.21413234553405  | -0.77991552755603 |
| H | -0.37886031020084 | -8.70036984671532  | 3.41113621422671  |
| H | 0.13580725898359  | -10.18384843119411 | 2.56657598312143  |
| H | -1.58648587699629 | -9.94410773215650  | 2.97616583235659  |
| C | 6.41627560000987  | -1.61573950198645  | 0.92973174060319  |
| C | 6.12912858162264  | -1.51216657376008  | -1.60427166406304 |
| H | 4.99648742637121  | -2.73801101169046  | -0.24378642503362 |
| H | 6.57029035706242  | -0.50623509696933  | -1.66079051105699 |



|   |                  |                   |                   |
|---|------------------|-------------------|-------------------|
| H | 5.40595057476197 | -1.62724788120074 | -2.42654163968185 |
| H | 6.93111702638051 | -2.25286089675867 | -1.74831818950576 |
| H | 6.86436195046135 | -0.61235472109584 | 0.96888777966497  |
| H | 7.22479648152640 | -2.35629542393104 | 0.82798204147882  |
| H | 5.89585996794228 | -1.80576267650014 | 1.88137334534221  |
